# Supplementary material for: Uncovering Novel Features of the Pc Locus in Horn Development from Gene-Edited Holstein Cattle by RNA-Sequencing Analysis
Source: MDPI journal article supplement (doi:10.3390/ijms232012060), 2022-10-11
Supplement: s1 [file s1]

**Table S4.** Primer sequences for RT-qPCR

| Gene ID | Gene Primer Name | Primer Sequence               |
|---------|------------------|-------------------------------|
| 507053  | RXFP2-F          | 5'- AGAACCCCACAATCCAGATG-3'   |
|         | RXFP2-R          | 5'- TGACCCTGGAGAAGTTCCTG-3'   |
| 782170  | TWIST1-F         | 5'- TGTGAGTCAGTTTGATCCCAAT-3' |
|         | TWIST1-R         | 5'- GGCATCATTATGGACTTTCTCC-3' |
| 282637  | CDH1-F           | 5'- GGCTGGACCGTGAGAGTTTT-3'   |
|         | CDH1-R           | 5'- GCAGTTGTGCTCAAGCCTTC-3'   |
| 282637  | ITGB3-F          | 5'- TGACATCCTGGTGGTCTTGC-3'   |
|         | ITGB3-R          | 5'- AGTGGGTTGTTGGCAGTGTC-3'   |
| 281592  | ACTA1-F          | 5'- GAAGTCTCGCTTCCTTCCCA-3'   |
|         | ACTA1-R          | 5'- GGTATCTGGTTTCTGGGCGG-3'   |
| 536607  | ACTN2-F          | 5'- GAGGCTAGCGAGTGAGCTTT-3'   |
|         | ACTN2-R          | 5'- CTTCTCCTGCACCTTGGGAG-3'   |
| 539375  | ACTN3-F          | 5'- CACTTTGACCGGAAGCGGAA-3'   |
|         | ACTN3-R          | 5'- TCATGATGCGAGCGAACTCC-3'   |
| 538107  | ASXL3-F          | 5'- CCACGTCATCAGCAGAACCA-3'   |
|         | ASXL3-R          | 5'- TTTTCTAGTGCCAGGCGGG-3'    |
| 353115  | SOX10-F          | 5'- GCAAGCTCTGGAGGCTGCT-3'    |
|         | SOX10-R          | 5'- GGTGGGCGCTCTTGTAGTG-3'    |
| 281181  | GAPDH-F          | 5'- GGGTCATCATCTCTGCACCT-3'   |
|         | GAPDH-R          | 5'- GGTCATAAGTCCCTCCACGA-3'   |
