# Supplementary material for: Uncovering Novel Features of the Pc Locus in Horn Development from Gene-Edited Holstein Cattle by RNA-Sequencing Analysis
Source: MDPI journal article supplement (doi:10.3390/ijms232012060), 2022-10-11
Supplement: s1 [file s1]

**Table S3.** Primer sequences for PCR

| Primer Name | Primer Sequence                 | annealing temperature | PCR product size |
|-------------|---------------------------------|-----------------------|------------------|
| btHP-1748-F | 5'-GGGCAAGTTGCTCAGCTGTTTTTG-3'  | 58°C                  | 1546 bp          |
| btHP-1594-R | 5'-TGAATCCTGCTAAACCATGCGGA-3'   |                       |                  |
| NEW-F       | 5'- CCATGAGAATTAGAGTGGGATGC-3'  | 58°C                  | 1318 bp          |
| NEW-R       | 5'- CATGGTTCACTCATAGTGA CTCC-3' |                       |                  |

**Sequence of Pc locus**

CTGTGAAATGAAGAGTACGTGGTACCAACTACTTTCTGAGCTCACGCACAGCTGGACG  
TCTGCGCCTTTCTTGTTATACTGCAGATGAAAACATTTTATCAGATGTTTGCCTAAGTAT  
GGATTACATTTAAGATACATATTTTTCTTTCTTGTCTGAAAGTCTTTGTAGTGAGAGCAG  
GCTGGAATTATGTCTGGGGTGAGATAGTTTTCTT
